# Supplementary material
Source: PubMed Central journal article supplement (PMC3744058)
Supplement: NIHMS76748-supplement-1.pdf [file NIHMS76748-supplement-1.pdf]

**Supplementary Table 1. Patients' psychotropic medications.**

| <b>Subject</b> | <b>APD1</b> | <b>Dose1</b> | <b>APD2</b> | <b>Dose2</b> | <b>Other Psychotropic</b> |
|----------------|-------------|--------------|-------------|--------------|---------------------------|
| 1              | Clozapine   | 500          | Quetiapine  | 100          | Lorazepam                 |
| 2              | Clozapine   | 700          | Risperidone | 4            | Sertraline, Clonazepam    |
| 3              | Clozapine   | 125          |             |              |                           |
| 4              | Clozapine   | 175          |             |              | Sertraline, Lorazepam     |
| 5              | Clozapine   | 300          |             |              |                           |
| 6              | Clozapine   | 400          |             |              | Paroxetine                |
| 7              | Haloperidol | 62.5*        |             |              |                           |
| 8              | Olanzapine  | 12.5         |             |              |                           |
| 9              | Olanzapine  | 15           |             |              |                           |
| 10             | Risperidone | 1            |             |              |                           |
| 11             | Risperidone | 2            |             |              |                           |
| 12             | Risperidone | 3            |             |              |                           |
| 13             | Risperidone | 3            |             |              |                           |
| 14             | Risperidone | 6            |             |              | Paroxetine                |
| 15             | Risperidone | 6            |             |              |                           |
| 16             | Risperidone | 8            |             |              | Benzotropine, Clonazepam  |
| 17             | Risperidone | 12.5#        |             |              |                           |
| 18             | Ziprasidone | 160          |             |              |                           |

Abbreviations: APD1, first antipsychotic drug; Dose1, oral dose of APD1, in mg (unless otherwise noted); APD2, second antipsychotic drug; Dose2, oral dose of APD2, in mg (unless otherwise noted);

\* = intramuscular dose, Q 4 weeks; # = intramuscular dose, Q 2 weeks

**Supplementary Table 2. Results of Spearman Correlation Analyses between MRI BOLD Responses to Unexpected Juice Deliveries (positive TDEs) and Standard Juice Deliveries in Patients**

| ROI Source                              | Region of Interest      | Rho          | p                 |
|-----------------------------------------|-------------------------|--------------|-------------------|
| WBA: ME of<br>TDE Valence               | (1) R Midbrain          | 0.265        | 0.287             |
|                                         | (2) L Putamen           | -0.261       | 0.295             |
|                                         | (3) L Insula            | 0.329        | 0.182             |
|                                         | (4) R Insula            | 0.110        | 0.663             |
|                                         | (5) L Precentral Gyrus  | 0.082        | 0.748             |
|                                         | (6) R Precentral Gyrus  | 0.104        | 0.681             |
|                                         | (7) L Postcentral Gyrus | 0.352        | 0.152             |
|                                         | (8) R Postcentral Gyrus | 0.179        | 0.478             |
|                                         | (9) L Declive           | -0.094       | 0.711             |
| WBA: Group x TDE<br>Valence Interaction | (10) R Putamen          | 0.335        | 0.174             |
|                                         | (11) L Precentral Gyrus | <b>0.856</b> | <b>&lt; 0.001</b> |
| A priori                                | (12) L Putamen          | <b>0.490</b> | <b>0.039</b>      |
|                                         | (13) R Putamen          | <b>0.670</b> | <b>0.002</b>      |

Abbreviations: WBA, whole-brain analysis; ME, main effect; TDE, temporal difference error

**Supplementary Table 3. Clusters showing significant activations by the conditioned stimulus, in the entire sample.**

| Location |                      | Vol ( $\mu$ l) | # Voxels | X , Y , Z      | Mean t |
|----------|----------------------|----------------|----------|----------------|--------|
| (1)      | Visual Cortex        | R 98864        | 2515     | 7 , -69 , 6    | 6.05   |
| (2)      | Fusiform Gyrus       | R 856          | 22       | -44 , -57 , -7 | 3.23   |
| (3)      | Sup. Parietal Lobule | L 2412         | 61       | -26 , -62 , 45 | 3.20   |
| (4)      | Inf. Parietal Lobule | L 483          | 12       | -46 , -45 , 43 | 2.68   |
| (5)      | Precuneus            | R 478          | 12       | 12 , -47 , 47  | 2.44   |
| (6)      | Precentral Gyrus     | L 3198         | 81       | -40 , 2 , 36   | 3.57   |
| (7)      |                      | R 3406         | 87       | 45 , 4 , 36    | 3.41   |
| (8)      | Inf. Frontal Gyrus   | L 600          | 15       | -31 , 26 , 4   | 3.75   |
| (9)      |                      | R 796          | 20       | 41 , 22 , 11   | 3.96   |
| (10)     | Cingulate Gyrus      | R 427          | 11       | 10 , 20 , 41   | 2.82   |
| (11)     | Thalamus             | R 721          | 18       | -22 , -27 , -2 | 3.25   |

**Supplementary Figure 1. ROI analyses of clusters showing significant activations by the conditioned stimulus, in patients and controls.**

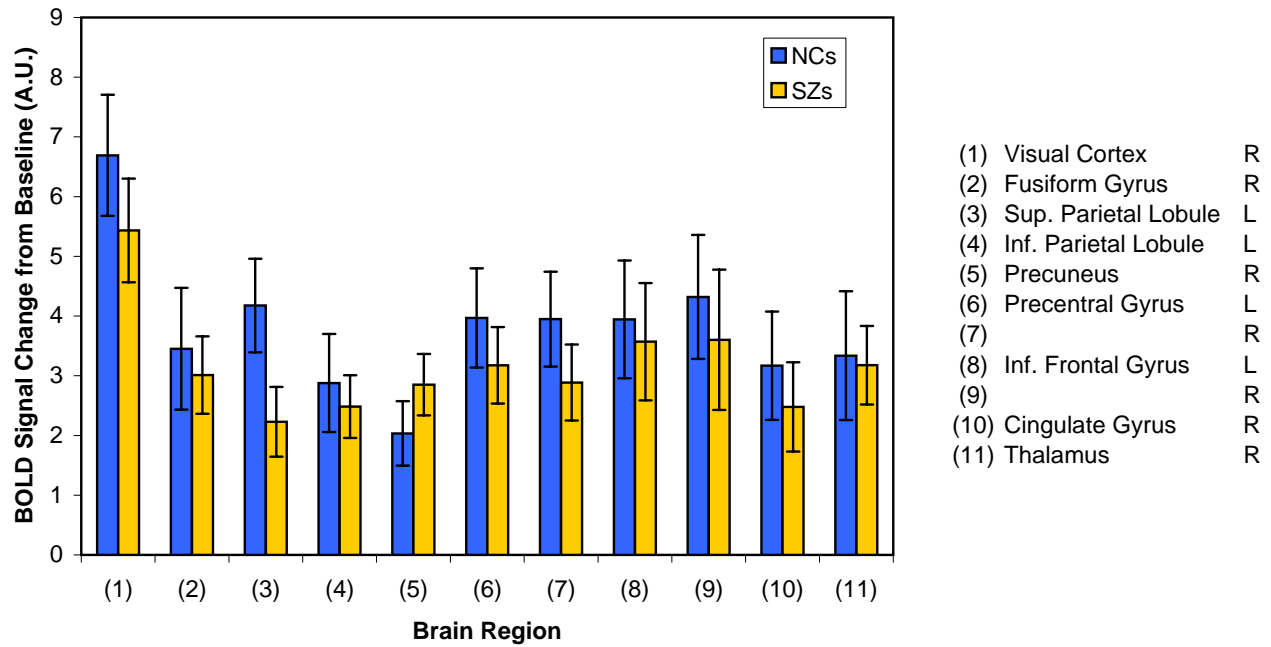

Supplementary Figure 2. Scatter plots of avolition ratings by BOLD responses to the juice reinforcer

**A**

### Left Frontal Operculum

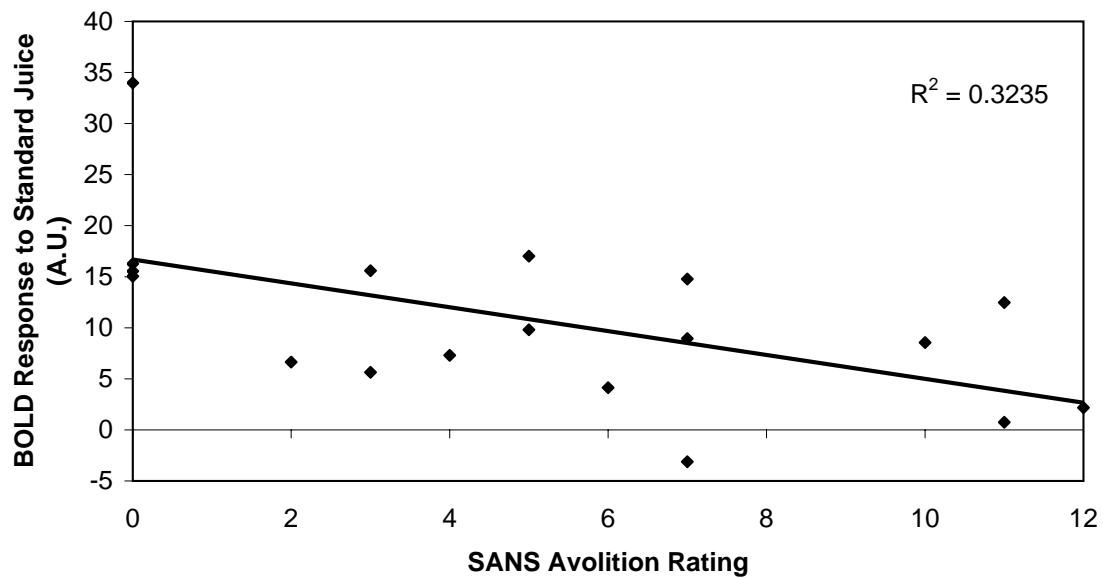

**B**

### Left Putamen

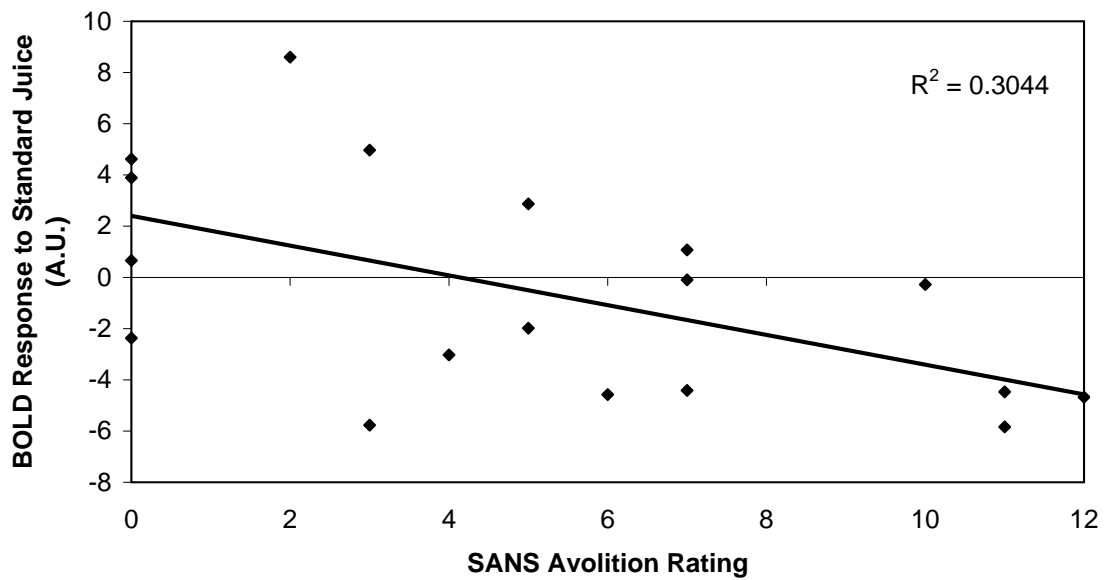

## Supplementary Figure Captions

Supplementary Figure 1. In order to determine whether patients' responses to the conditioned stimulus were also disrupted, we examined BOLD responses to the light cue, relative to baseline. Patients and controls did not differ in their cue-evoked activations in any of these areas. There was a trend toward a group difference in the left superior parietal lobule, however. MRI signal changes expressed in arbitrary units.

Supplementary Figure 2. Scatter plots of standard juice responses by avolition ratings from the SANS in the *a.* left frontal operculum (primary gustatory cortex) and *b.* the left putamen ROI, selected a priori (talairach coordinates: -18, 2, 8). MRI signal changes expressed in arbitrary units.
